# Supplementary material for: Simultaneous removal of Eriochrome Black T and chromate anions from aqueous solution using functionalized magnetic polymers
Source: Research Square preprint supplement (doi:10.21203/rs.3.rs-4481475/v1), 2024-06-11
Supplement: Supplementary file 1 [file 13992873a08f5b61dd358a4e.docx]

***Supplementary material for***

**Simultaneous removal of Eriochrome Black T and chromate anions from aqueous solution using functionalized magnetic polymers**

**Huda M. Alghamdi, Rihab M. Mohammad, Khalid Z. Elwakeel[[1]](#footnote-1)***

University of Jeddah, College of Science, Department of Chemistry, Jeddah, Saudi Arabia.

**Table S1.** BET surface area, pore volume and pore diameter of R-DETA and R-Dithizone adsorbents

| Adsorbent | BET surface area (m2 g-1)* | Pore volume (cm3 g-1) ** | Pore diameter (Å) ** |
| --- | --- | --- | --- |
| R-DETA | 11.0 | 0.207 | 7.5 |
| R-Dithizone | 9.5 | 0.192 | 6.3 |

*BET specific surface area measured by multipoint method.

**Pore volume and pore radius calculated with BJH method on N2 desorption

**Table S2.** Elemental analysis of MCGMA and R-DETA and R-Dithizone adsorbents

| Adsorbent | C (%) | H (%) | N (%) | N (mmol g-1) | O (%) | S (%) | S (mmol g-1) |
| --- | --- | --- | --- | --- | --- | --- | --- |
| MCGMA | 36.10 | 7.00 | 4.40 | 3.14 | 25.6 | - | - |
| R-DETA | 31.16 | 5.94 | 14.01 | 10.0 | 24.72 | - | - |
| R-Dithizone | 39.26 | 4.99 | 10.14 | 7.24 | 17.50 | 3.77 | 1.17 |

**Table S3.** The adsorption capacities of different adsorbents regarding Cr(VI) and EBT

| Adsorbent | Pollutant | pH | Qmax (mg g-1) | Equilibrium time (min) | Temp. (oC) | Reference |
| --- | --- | --- | --- | --- | --- | --- |
| Chitosan-SiO2-TiO2 | Cr(VI) | 3 | 182.43 | 120 | 25 ± 1 | [1] |
| Ionic liquid filled chitosan capsules | Cr(VI) | 2 | 110.94  ± 5.07 |  | 20 ± 1 | [2] |
| Chitosan/ploy (vinyl alcohol) porous microspheres were successfully prepared throughgelation and freeze-drying process | Cr(VI) | 3 | 334.7 | 60 | 25 ± 1 | [3] |
| Zirconium-based MOF and chitosan composites | Cr(VI) | 5 | 320.0 | 30 | 25 ± 1 | [4] |
| Zr4+ cross-linked chitosan-thiourea composite | Cr(VI) | 2 | 246.72  289.47  323.86 | 90 | 25 ± 1  35 ± 1  40 ± 1 | [5] |
| Poly[(glycidyl methacrylate)-*co*-(ethylene glycol dimethacrylate)] | Cr(VI) | 2 | 214 | 60 | 70 ± 1 | [6] |
| Ethylenediaminetetraacetic -crosslinking-chitosan/polypyrrole | Cr(VI) | 6 | 401.25 |  | 25 ± 1 | [7] |
| Activated carbon derived from Eichhornia crassipes | Cr(VI) | 5 | 26.66 | 90 | 25 ± 1 | [8] |
| Coffee Polyphenol-Formaldehyde/Acetaldehyde Resin | Cr(VI) | 2 |  | 150 | 25 ± 1 | [9] |
| SiO2/polyaniline composite | Cr(VI) | 5-6 | 285.5 | 60 | - | [10] |
| R-DETA | Cr(VI) | 3.3 | 192.90 | 180 | 25 ± 1 | This study |
| R-Dithizone | Cr(VI) | 3.3 | 227.74 | 180 | 25 ± 1 | This study |
| SiO2/polyaniline composite | EBT | 5-6 | 90.23 | 60 | - | [10] |
| Acid and alkaline activated volcanic ash-based geopolymers. Acid activation (GPAc); alkaline activation (GPAlk) | EBT | 3-6 | GPAc = 10.34  GPAlk = 8.15 | 30 | 25 ± 1 | [11] |
| Sodium zinc phosphate/polyaniline nanocomposite | EBT | 2 | 234.4 | 150 | - | [12] |
| MgCO3/MnCO3  (Abbreviated as MC) and MgMn2O4/Mn2O3 (Abbreviated as MO) | EBT | 3 | MC= 416.67  MO= 386.10 | - | 25 ± 1 | [13] |
| R-DETA | EBT | 3.3 | 323.4281 | 180 | 25 ± 1 | This study |
| R-Dithizone | EBT | 3.3 | 199.3166 | 180 | 25 ± 1 | This study |


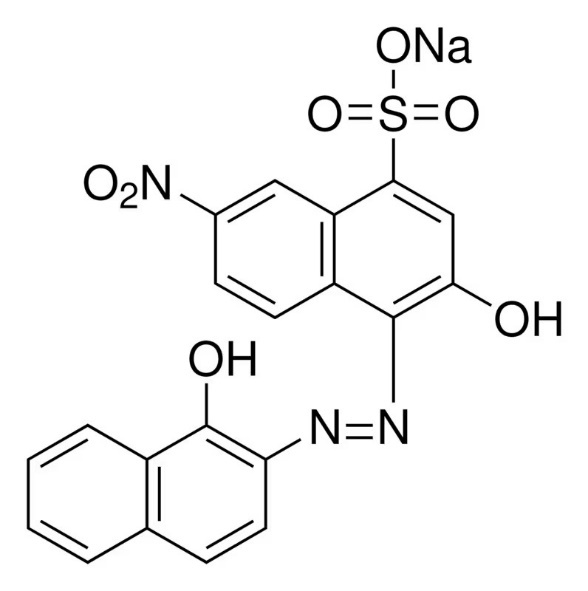


**Scheme S1:** Eriochrome Black T chemical structure

**Figure S1:** TEM images of magnetite NPs

| **R-DETA** | **R-Dithizone** |
| --- | --- |
| 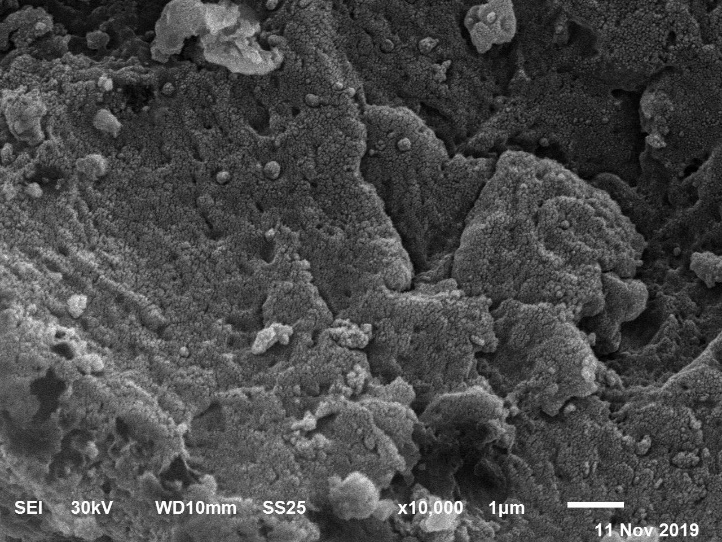 | 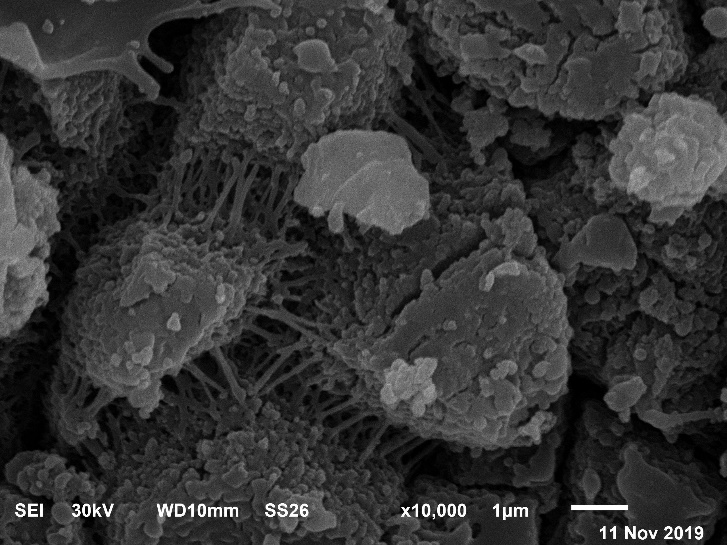 |
| 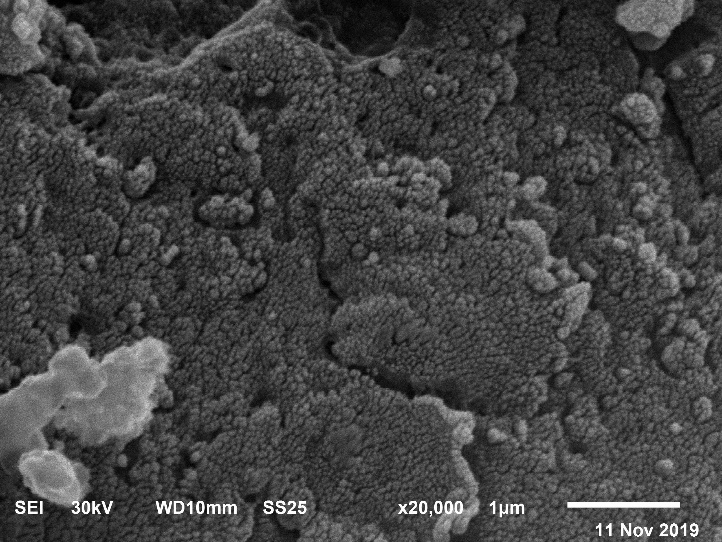 | 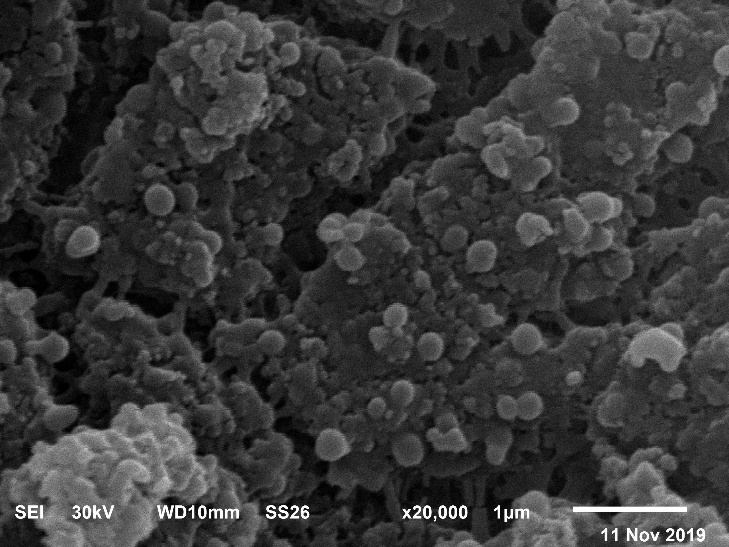 |
| 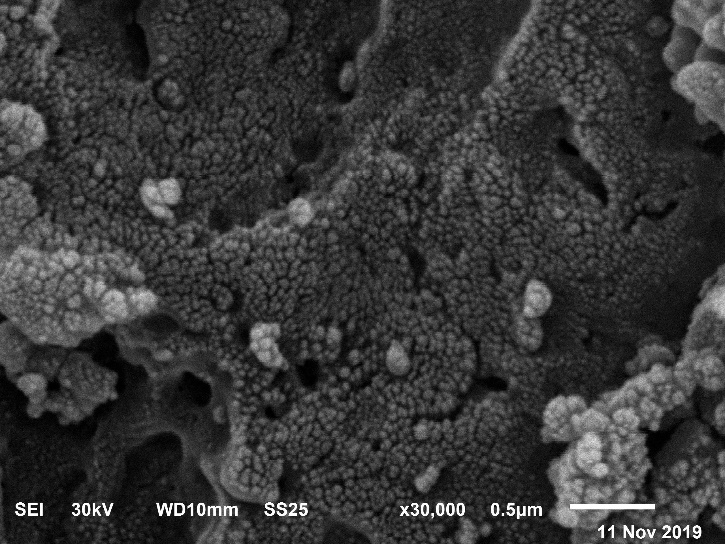 | 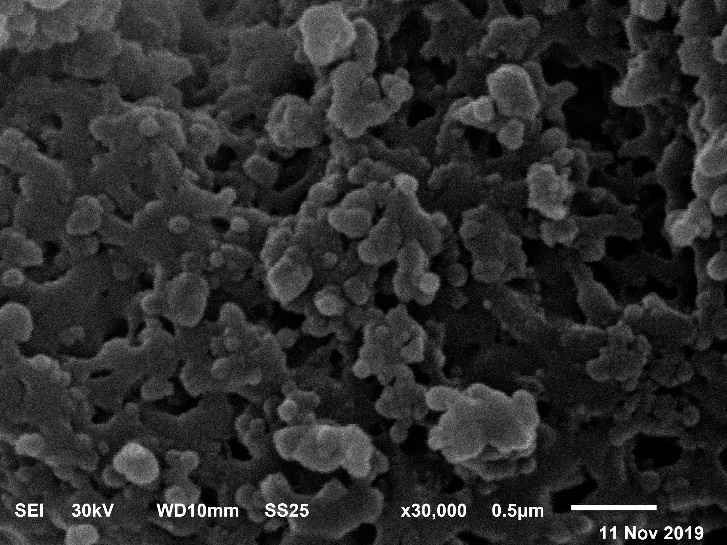 |

**Figure S2:** SEM photos of R- DETA (left column) and R-Dithizone adsorbents (right column).

| **R-DETA** | **R-Dithizone** |
| --- | --- |
|  |  |
|  |  |
|  |  |

**Figure S3:** TEM photos of R- DETA (left column) and R-Dithizone adsorbents (right column).


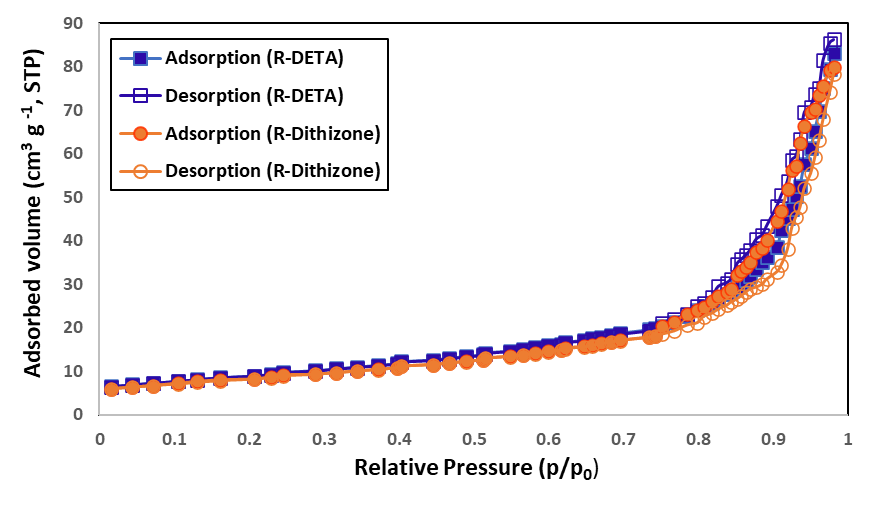


**Figure S4:** Nitrogen adsorption/desorption curves of R-DETA and R-Dithizone adsorbents.

**Figure S5:** Vibrating sample magnetometry (VSM) curves for Fe3O4 NPs, MCGMA, R-DETA and R-Dithizone adsorbents


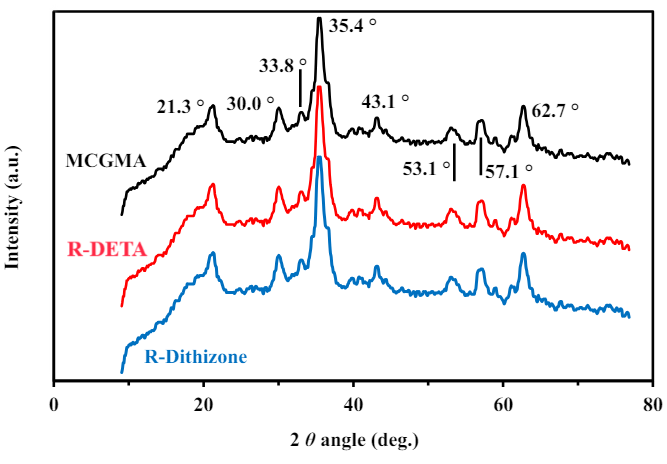


**Figure S6:** XRD patterns for MCGMA, R-DETA and R-Dithizone

**Figure S7:** Differential light scattering (DLS) for Fe3O4 NPs, MCGMA, R-DETA and R-Dithizone adsorbents


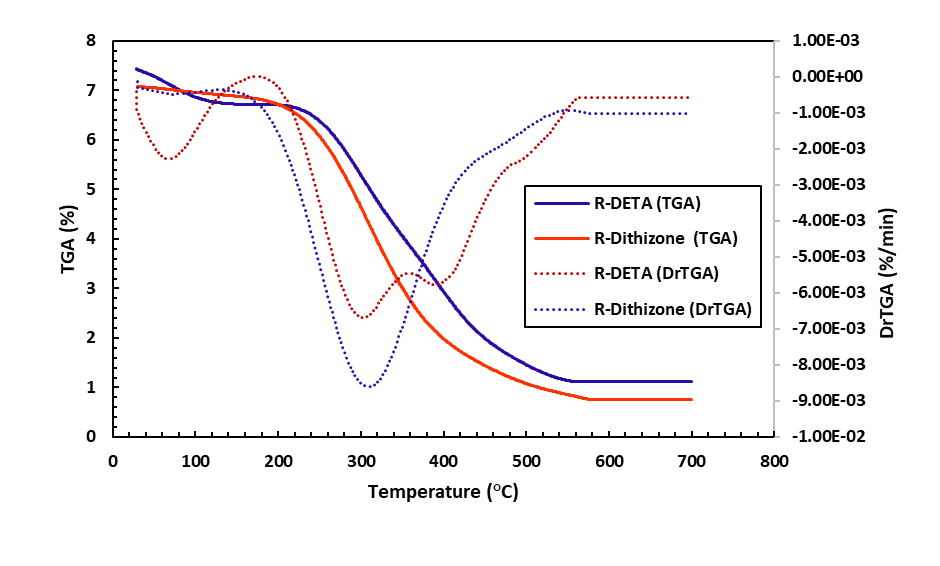


**Figure S8:** Thermogravimetric analysis (TGA) of R-DETA and R-Dithizone sorbents


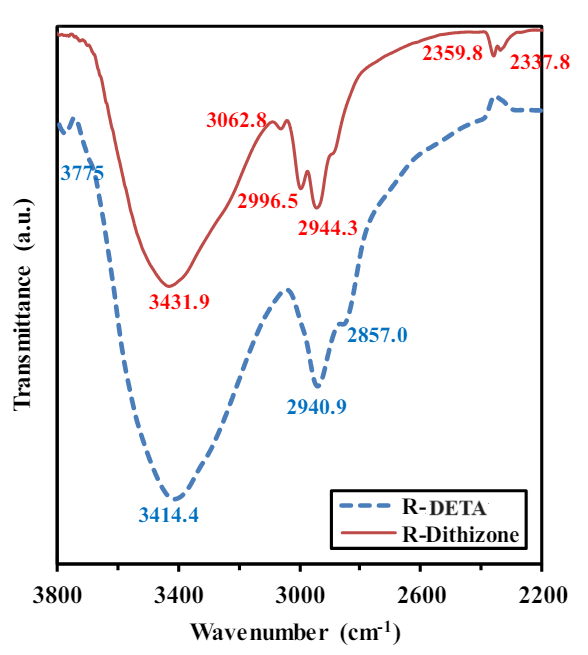


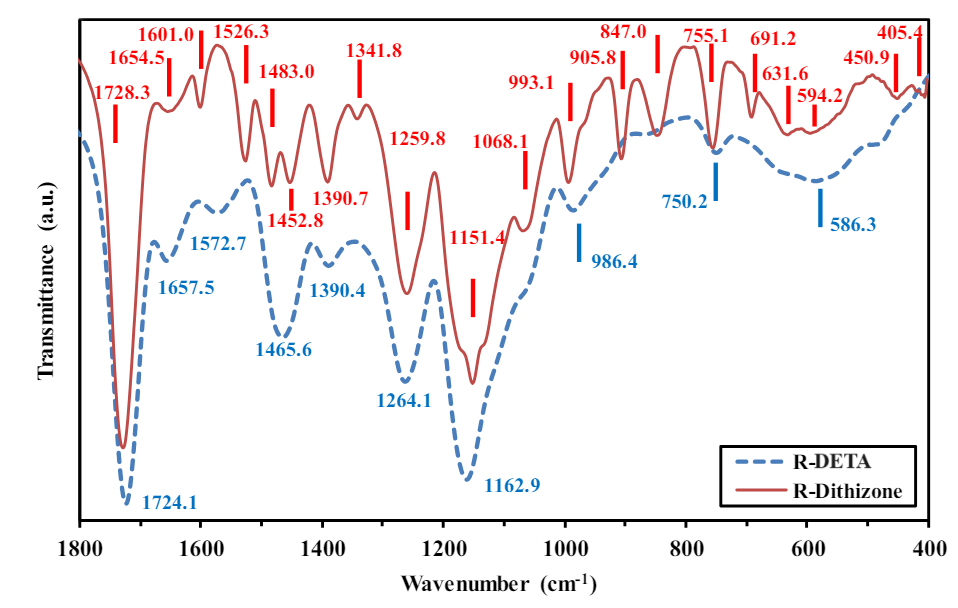


**Figure S9:** FTIR spectra of R-DETA and R-Dithizone adsorbents.

**Figure S10:** Zeta potential plots for R-DETA and R-Dithizone adsorbents


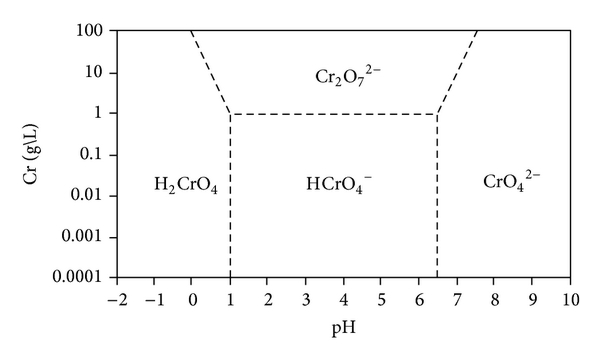


**Figure S11:** Chormium(VI) speciation at different pH values [9]


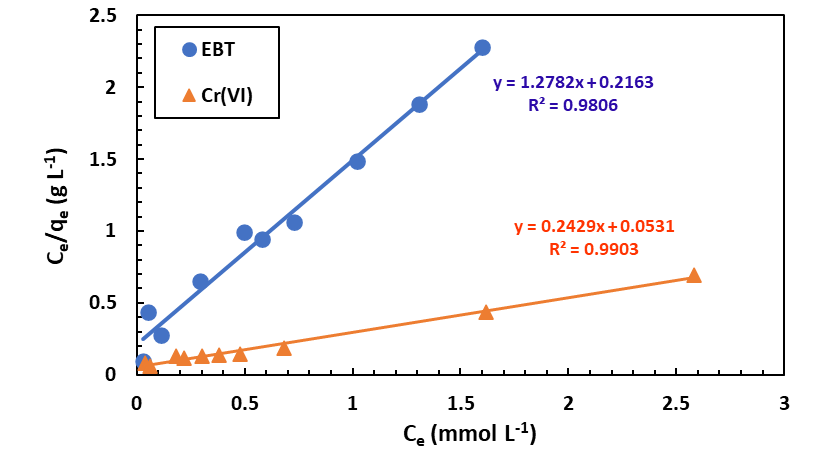


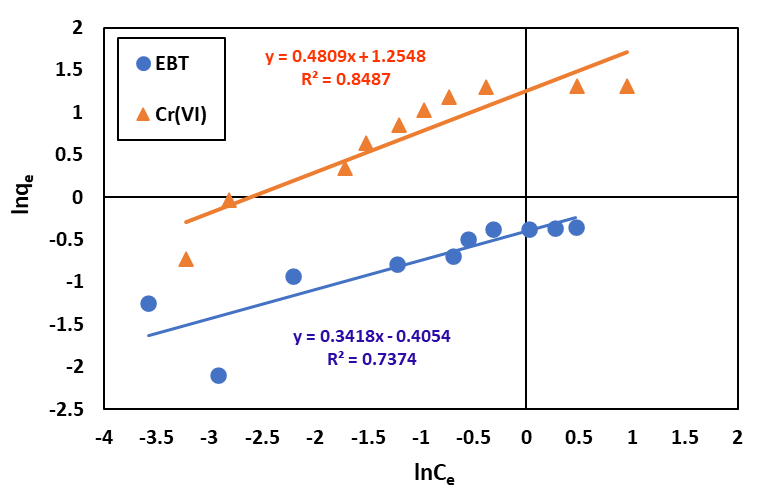


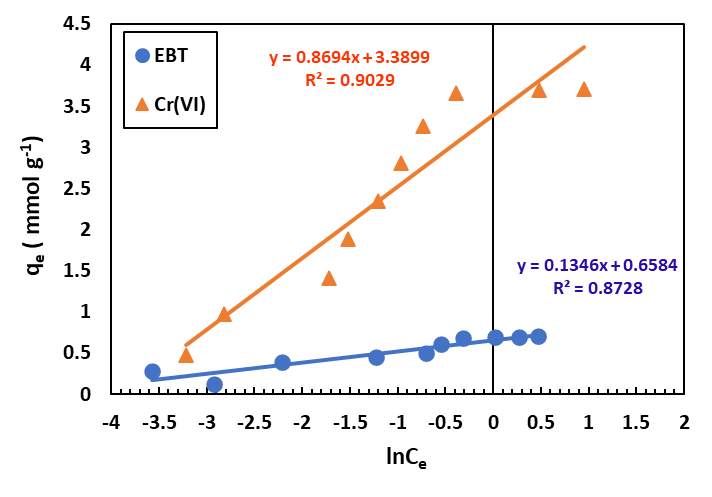


**Figure S12:** Linear sorption isotherms of EBT and Cr(VI) sorption from their binary solution on R-DETA (Sorbent mass 0.05 g; V: 0.025 L; t: 180 min; temperature: 25 ± 1°C; agitation speed: 200 rpm; pH0: 3.3).


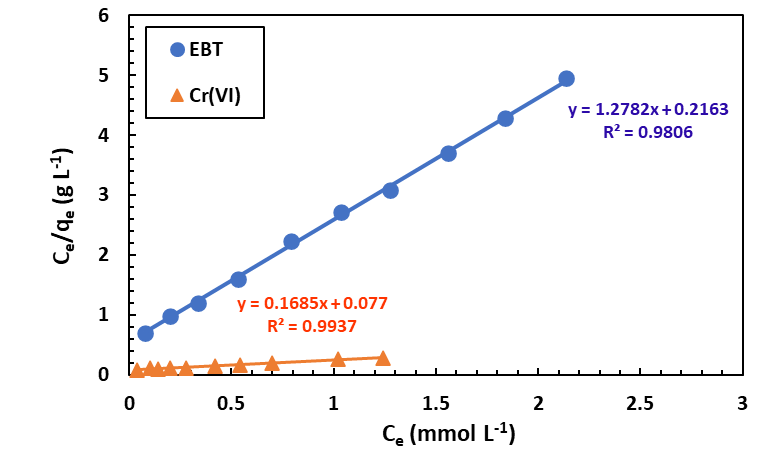


**Figure S13:** Linear sorption isotherms of EBT and Cr(VI) sorption from their binary solution on R-dithizone (Sorbent mass 0.05 g; V: 0.025 L; t: 180 min; temperature: 25 ± 1°C; agitation speed: 200 rpm; pH0: 3.3).

**References**

[1] R. El Kaim Billah, A. Shekhawat, S. Mansouri, H. Majdoubi, M. Agunaou, A. Soufiane, R. Jugade, Adsorptive removal of Cr(VI) by Chitosan-SiO2-TiO2 nanocomposite, Environ. Nanotechnol. Monit. Manag. 18 (2022) 100695. <https://doi.org/10.1016/j.enmm.2022.100695>.

[2] X. Lin, X. He, L. Lei, Y. Zhao, L. Cui, G. Wu, Development of ionic liquid filled chitosan capsules to remove Cr(VI) from acidic solution: Adsorption properties and mechanism, J. Environ. Chem. Eng. 10(4) (2022) 108081. <https://doi.org/10.1016/j.jece.2022.108081>.

[3] W. Song, T. Tong, J. Xu, N. Wu, L. Ren, M. Li, J. Tong, Preparation and application of green chitosan/ploy (vinyl alcohol) porous microspheres for the removal of hexavalent chromium, Materials Science and Engineering: B 284 (2022) 115922. <https://doi.org/10.1016/j.mseb.2022.115922>.

[4] F.M. Valadi, S. Shahsavari, E. Akbarzadeh, M.R. Gholami, Preparation of new MOF-808/chitosan composite for Cr(VI) adsorption from aqueous solution: Experimental and DFT study, Carbohydr. Polym. 288 (2022) 119383. <https://doi.org/10.1016/j.carbpol.2022.119383>.

[5] C. Xu, Y. Xu, D. Zhong, H. Chang, J. Mou, H. Wang, H. Shen, Zr4+ cross-linked chitosan-thiourea composite for efficient detoxification of Cr(VI) ions in aqueous solution, Carbohydr. Polym. 296 (2022) 119872. <https://doi.org/10.1016/j.carbpol.2022.119872>.

[6] B.M. Marković, I.S. Stefanović, R.V. Hercigonja, M.V. Pergal, J.P. Marković, A.E. Onjia, A.B. Nastasović, Novel hexamethylene diamine-functionalized macroporous copolymer for chromium removal from aqueous solutions, Polym. Int. 66(5) (2017) 679-689. <https://doi.org/10.1002/pi.5306>.

[7] Y. Shi, J. Feng, Z. Zhang, N. Cao, J. Li, H. Li, L. Li, Q. Hua, Q. Ma, K. Zhang, Simultaneous removal of Cr(VI) anions and metal cations by EDTA-crosslinking-chitosan/polypyrrole composites, Sep. Purif. Technol. 327 (2023) 124926. <https://doi.org/10.1016/j.seppur.2023.124926>.

[8] J. Fito, S. Tibebu, T.T.I. Nkambule, Optimization of Cr (VI) removal from aqueous solution with activated carbon derived from Eichhornia crassipes under response surface methodology, BMC Chemistry 17(1) (2023) 4. 10.1186/s13065-023-00913-6.

[9] K. Mulani, S. Daniels, K. Rajdeo, S. Tambe, N. Chavan, Adsorption of chromium (VI) from aqueous solutions by coffee polyphenol-formaldehyde/acetaldehyde resins, Journal of Polymers 2013 (2013).

[10] H. Hajjaoui, A. Soufi, M. Khnifira, M. Abdennouri, F.Z. Mahjoubi, N. Barka, Mono and binary mixture removal of eriochrome black T and Cr(VI) from water by SiO2/polyaniline composite, Mater. Chem. Phys. 296 (2023) 127220. <https://doi.org/10.1016/j.matchemphys.2022.127220>.

[11] S. Tome, D.T. Hermann, V.O. Shikuku, S. Otieno, Synthesis, characterization and application of acid and alkaline activated volcanic ash-based geopolymers for adsorptive remotion of cationic and anionic dyes from water, Ceram. Int. 47(15) (2021) 20965-20973. <https://doi.org/10.1016/j.ceramint.2021.04.097>.

[12] H. Hajjaoui, A. Soufi, H. Khiar, M. Abdennouri, M. Achak, N. Barka, Preparation of sodium zinc phosphate/polyaniline nanocomposite for Cr(VI) and eriochrome black T adsorption from water, Mater. Today Commun. 36 (2023) 106755. <https://doi.org/10.1016/j.mtcomm.2023.106755>.

[13] N.S. Al-Kadhi, F.A. Saad, R.K. Shah, E.S. Al-Farraj, G.S. El-Sayyad, E.A. Abdelrahman, A Facile Sol-gel Synthesis and Characterization of MgCO3/MnCO3 and MgMn2O4/Mn2O3 Novel Nanostructures With Remarkably High Adsorption Activity Toward Eriochrome Black T Dye, J. Inorg. Organomet .Polym. Mater. 33(7) (2023) 2046-2057. 10.1007/s10904-023-02660-6.

1. *Corresponding author:

   University of Jeddah, College of Science, Department of Chemistry, Jeddah, Saudi Arabia (K.Z. Elwakeel).

   E-mail address: [kelwkeel@uj.edu.sa](mailto:kelwkeel@uj.edu.sa) [↑](#footnote-ref-1)
