# Supplementary figures and images for: Simultaneous removal of Eriochrome Black T and chromate anions from aqueous solution using functionalized magnetic polymers
Source: Research Square preprint supplement (doi:10.21203/rs.3.rs-4481475/v1), 2024-06-11

**Graphical Abstract**

**
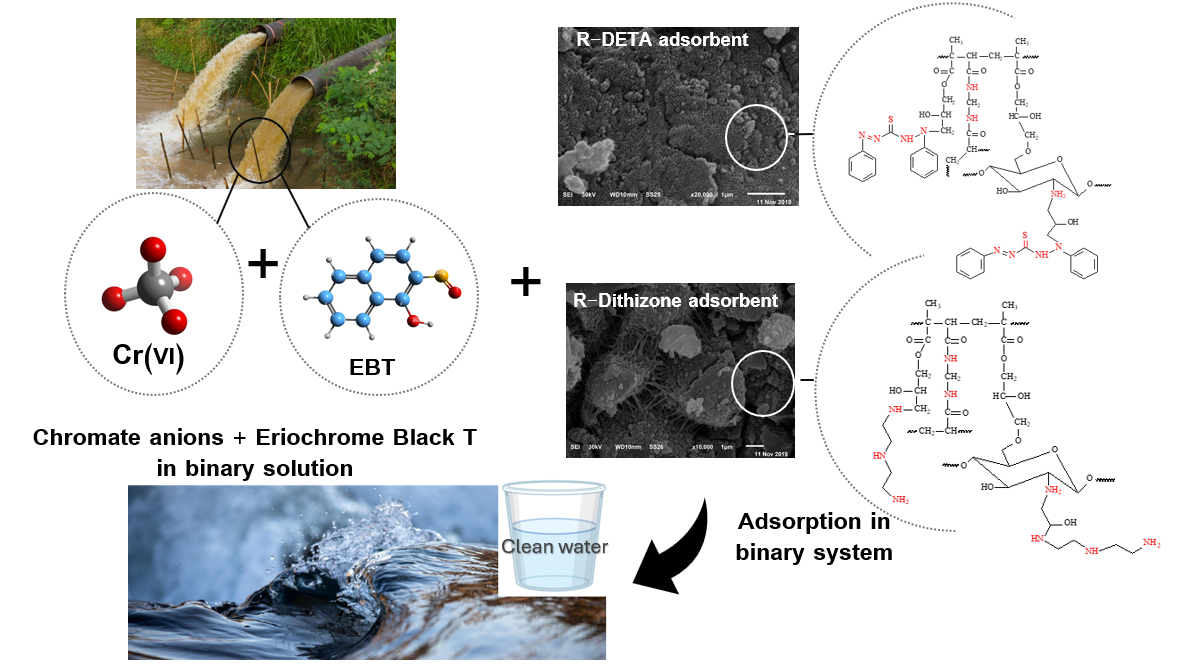
**

Supplement: Supplementary file 2 [file 54cb9a8993e19bb04e4336ec.docx]
